# Supplementary material for: Designing new iridium(iii) arene complexes of naphthoquinone derivatives as anticancer agents: a structure–activity relationship study
Source: Royal Society of Chemistry journal article supplement (doi:10.1039/c6dt04339a), 2017-01-01
Supplement: c6dt04339a1.pdf [file c6dt04339a1.pdf]

## Supplementary Information

### **Designing new Iridium(III) arene complexes of naphthoquinone derivatives as anticancer agents: A structure-activity relationship study**

Leila Tabrizi <sup>\*a,b</sup>, Hossein Chiniforoshan <sup>\*b</sup>

<sup>a</sup> School of Chemistry, National University of Ireland, Galway, University Road, Galway, Ireland

<sup>b</sup> Department of Chemistry, Isfahan University of Technology, Isfahan 84156-83111, Iran

Corresponding author: Leila Tabrizi; Email: LEILA.TABRIZI@nuigalway.ie

Corresponding author: H. Chiniforoshan; Email: Chinif@cc.iut.ac.ir

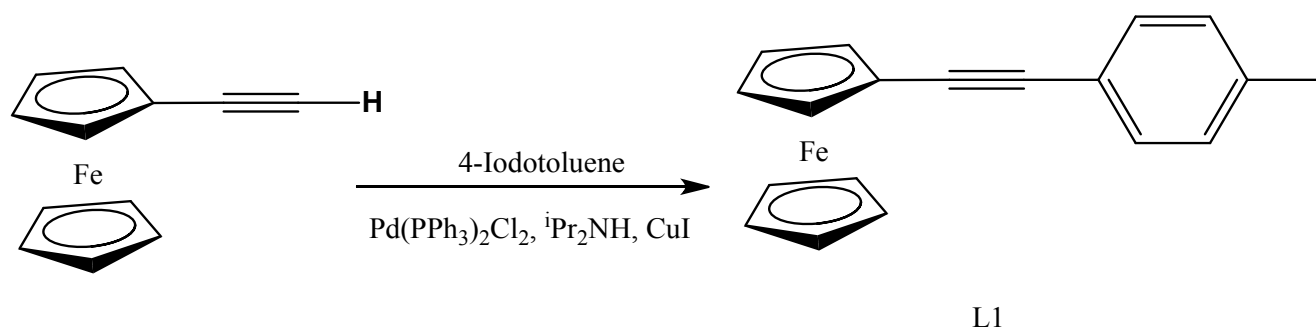

**Scheme S1.** Synthesis of Ligand L1

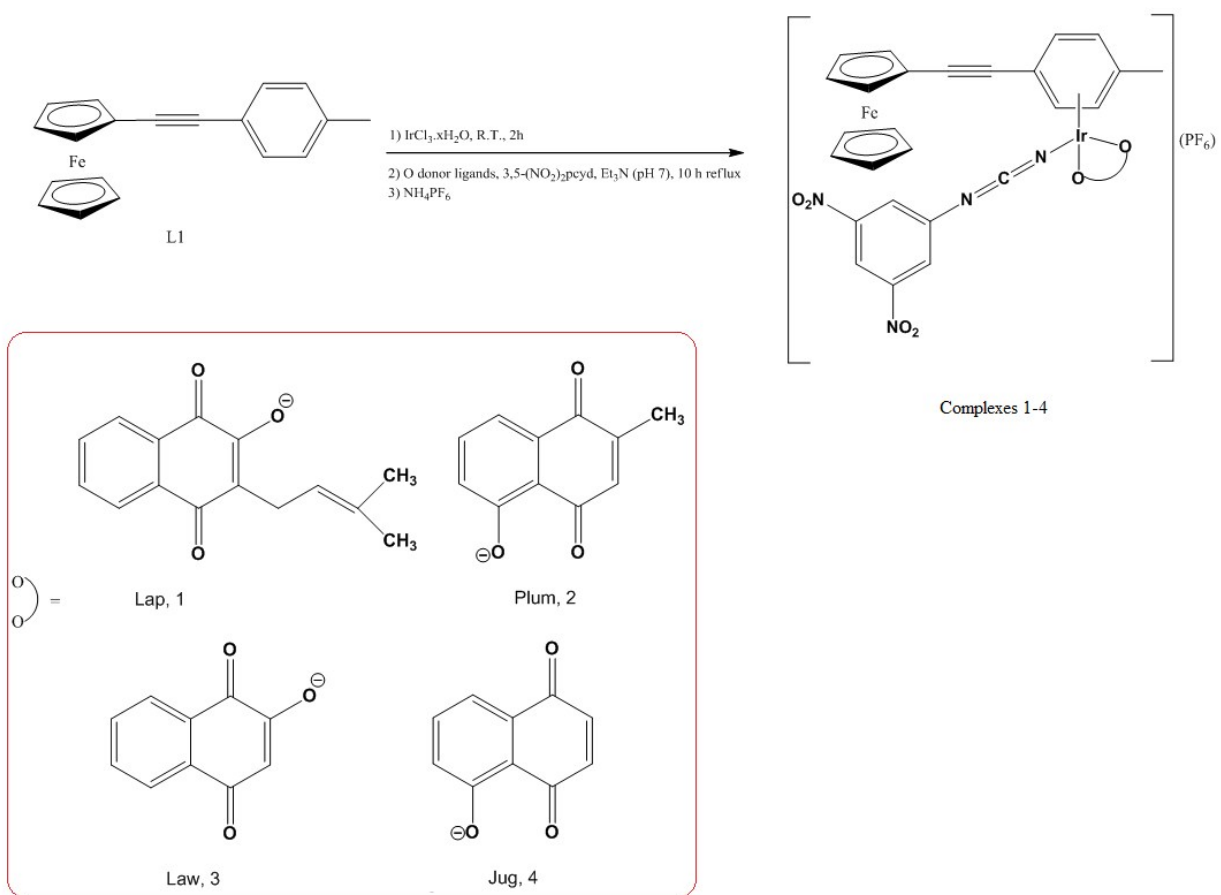

**Scheme S2.** Synthesis of complexes 1-4.

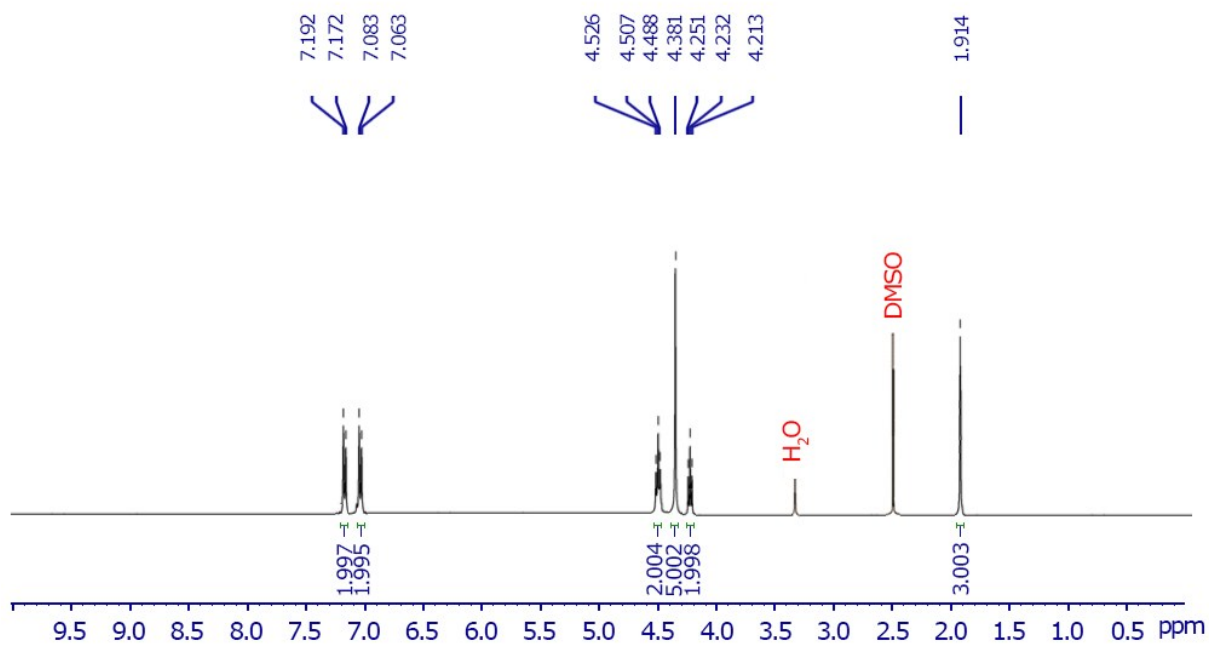

**Fig. S1.** <sup>1</sup>H NMR spectrum of ligand L1.

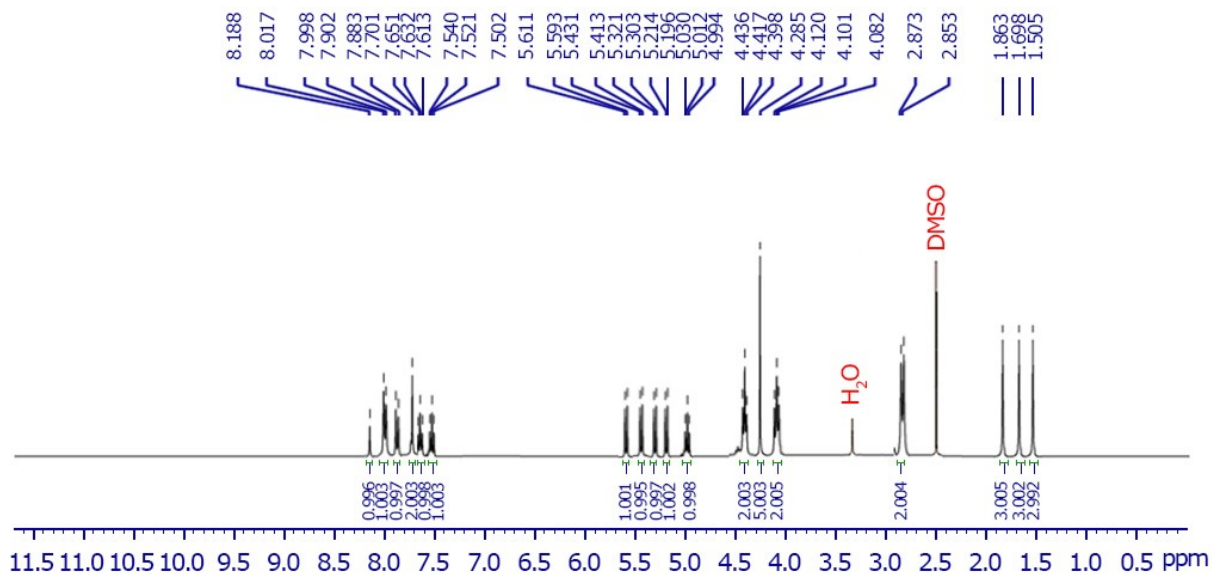

**Fig. S2.** <sup>1</sup>H NMR spectrum of Complex 1.

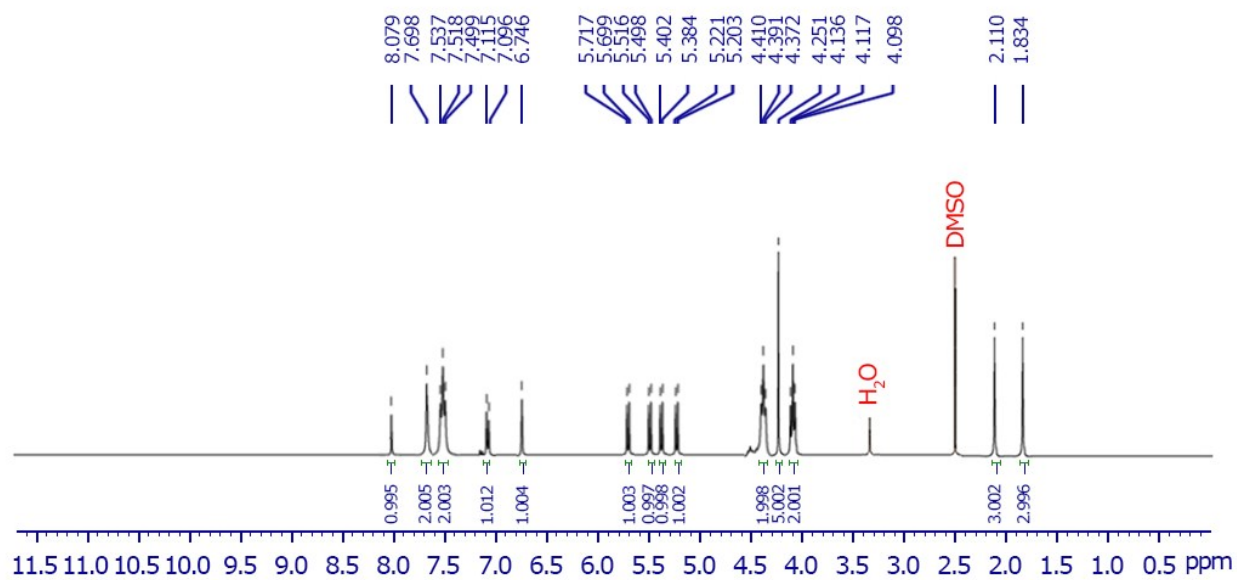

**Fig. S3.** <sup>1</sup>H NMR spectrum of Complex 2.

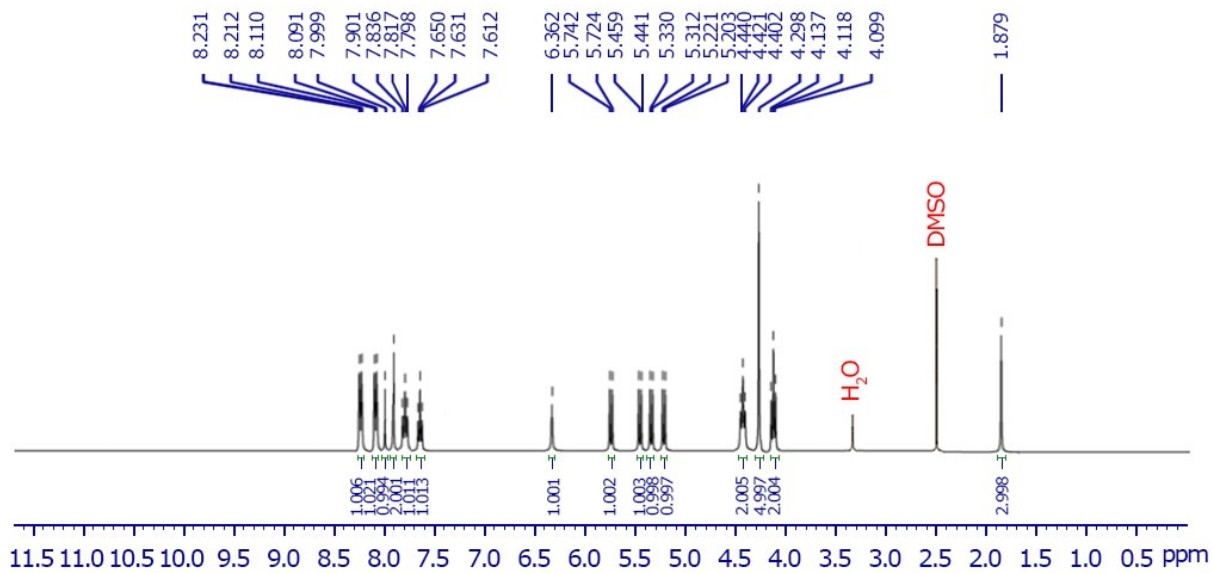

**Fig. S4.**  $^1\text{H}$  NMR spectrum of Complex 3.

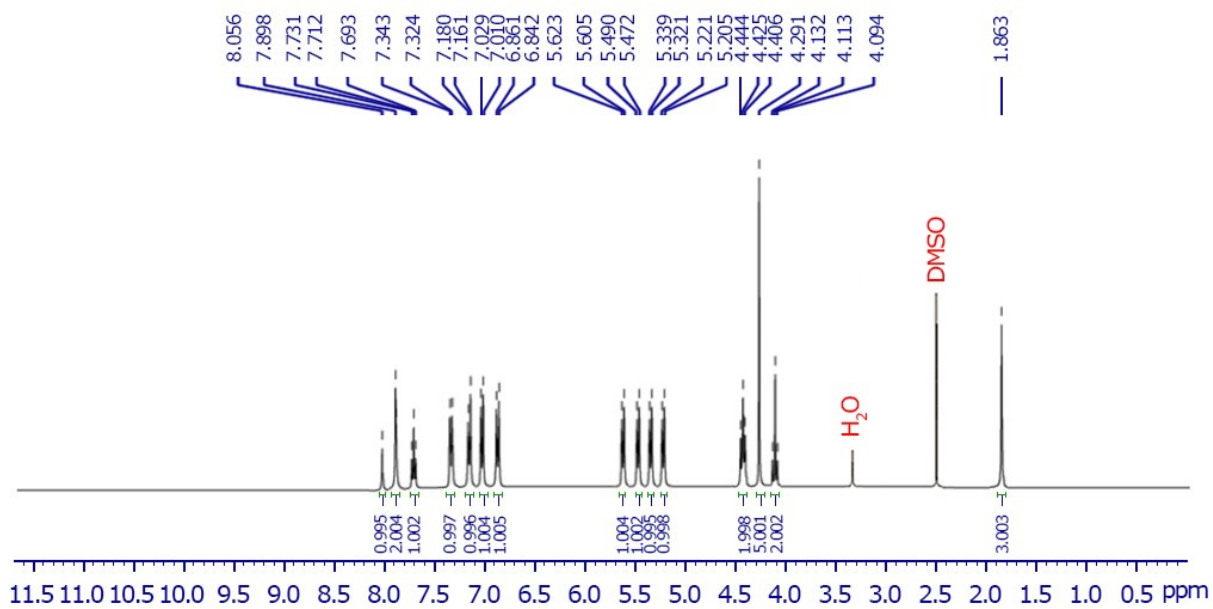

**Fig. S5.** <sup>1</sup>H NMR spectrum of Complex 4.



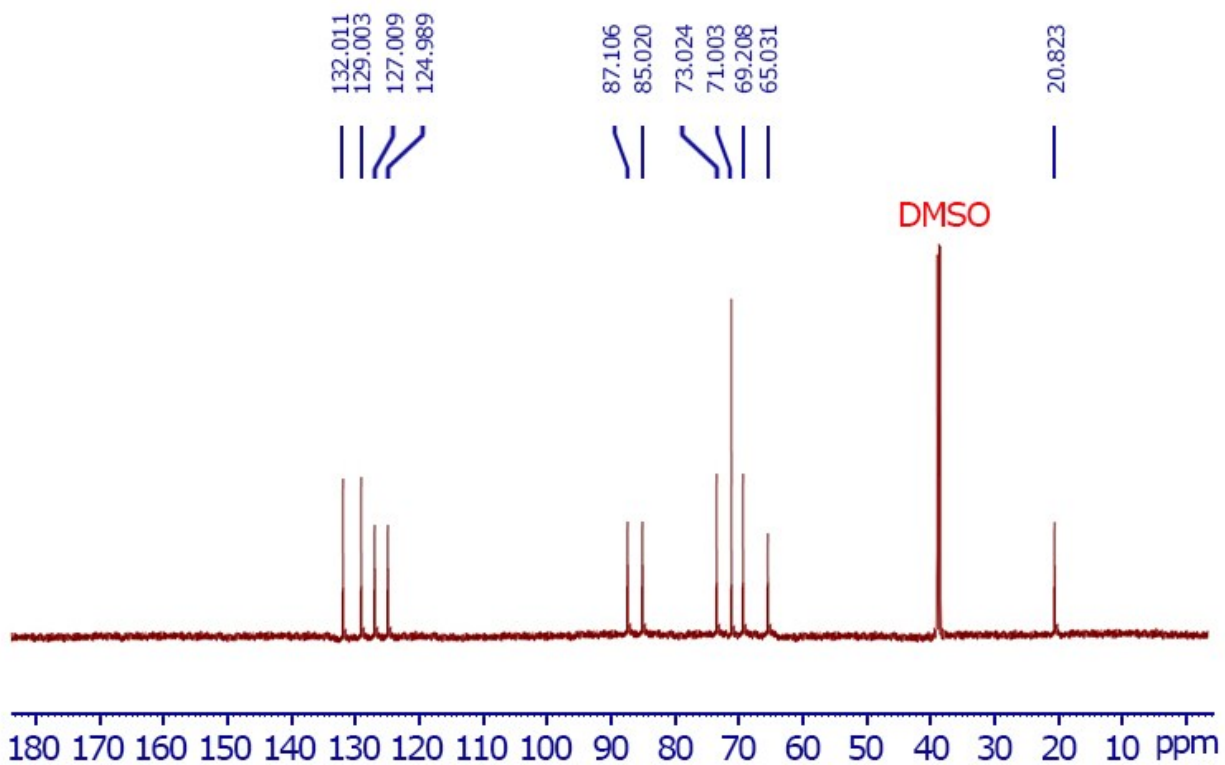

**Fig. S6.**  $^{13}\text{C}$  NMR spectrum of ligand L1.

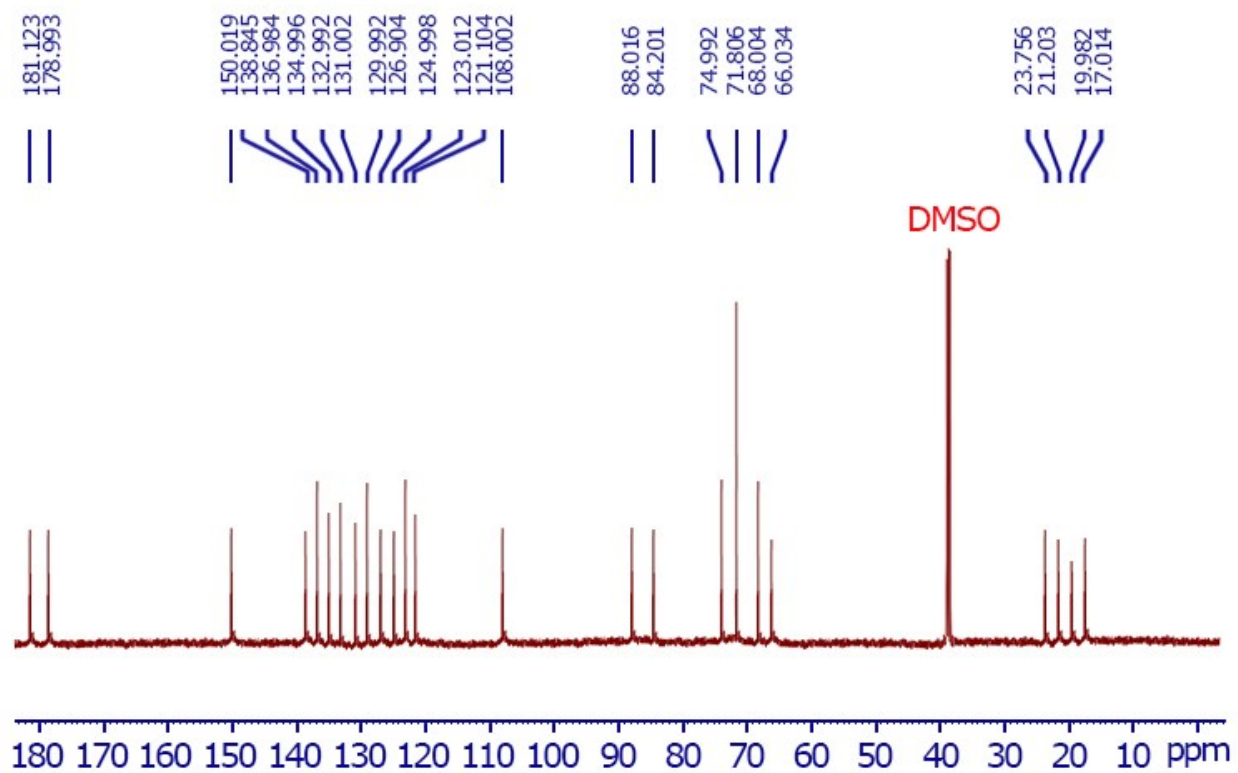

**Fig. S7.**  $^{13}\text{C}$  NMR spectrum of complex 1.

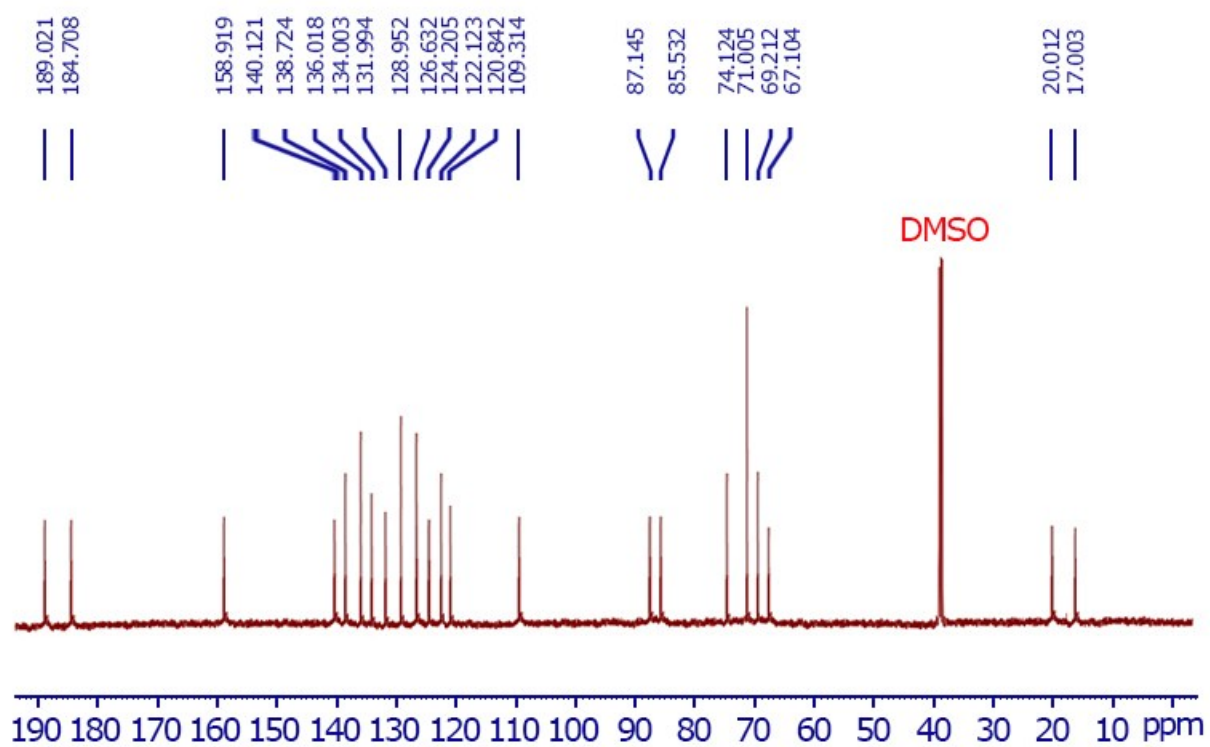

**Fig. S8.**  $^{13}\text{C}$  NMR spectrum of complex 2.

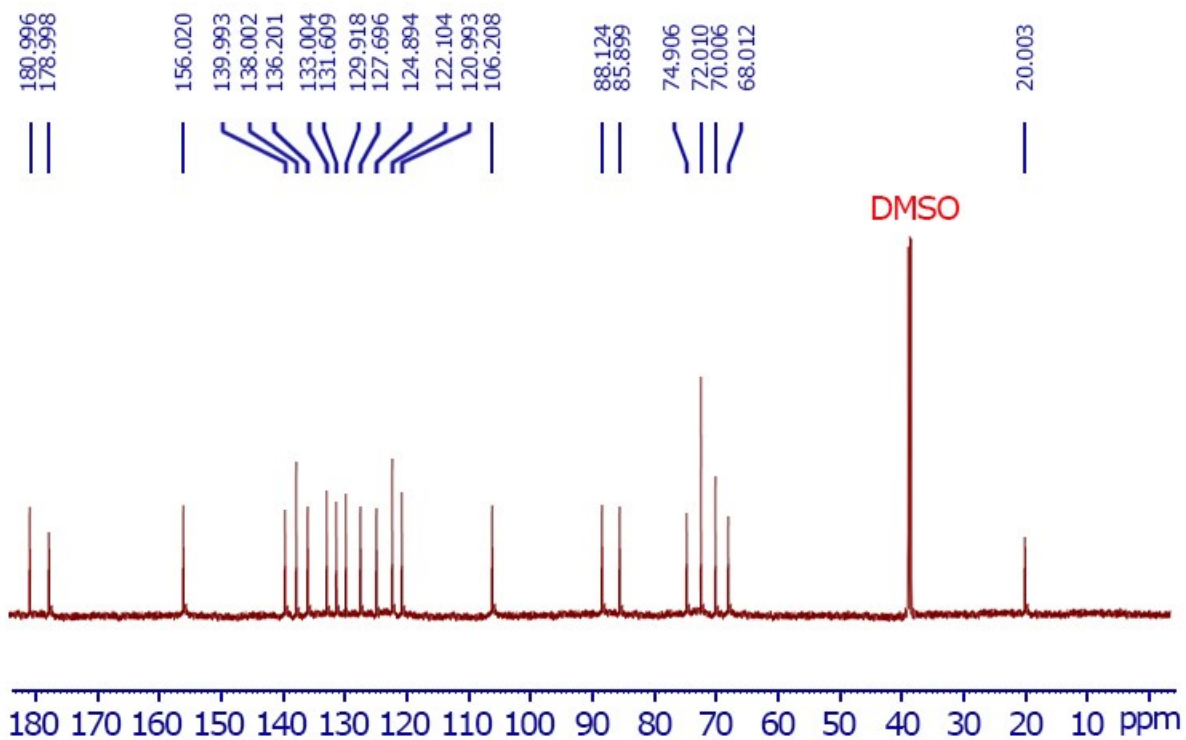

**Fig. S9.**  $^{13}\text{C}$  NMR spectrum of complex 3.

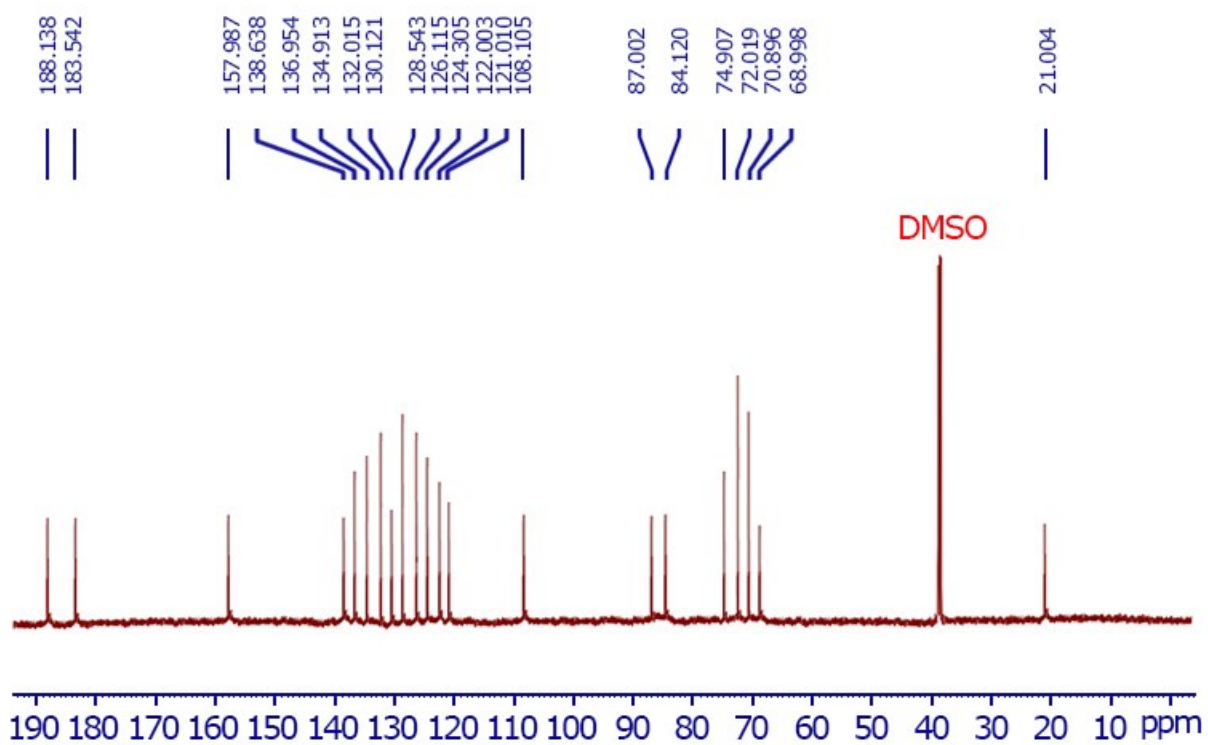

**Fig. S10.**  $^{13}\text{C}$  NMR spectrum of complex 4.

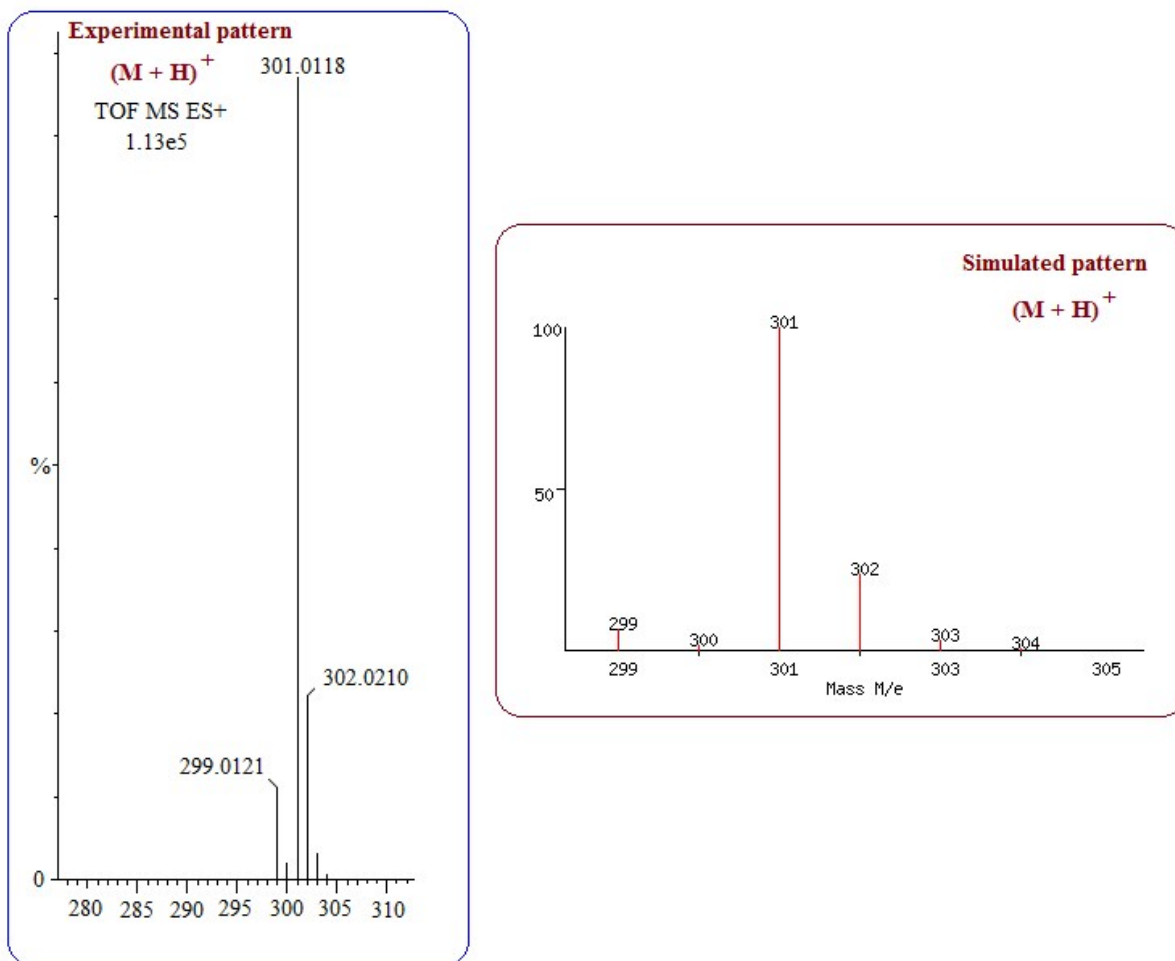

**Fig. S11.** TOF MS spectrum of ligand L1.

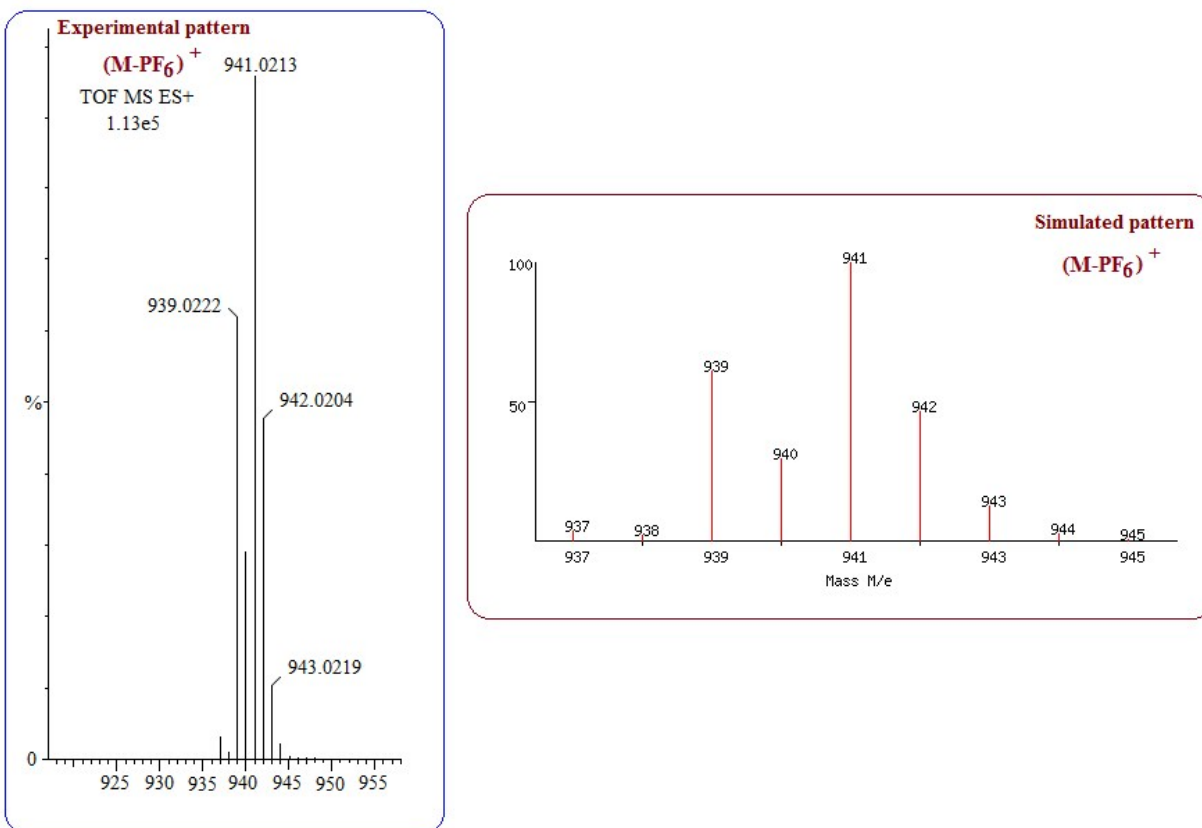

**Fig. S12.** TOF MS spectrum of complex 1.

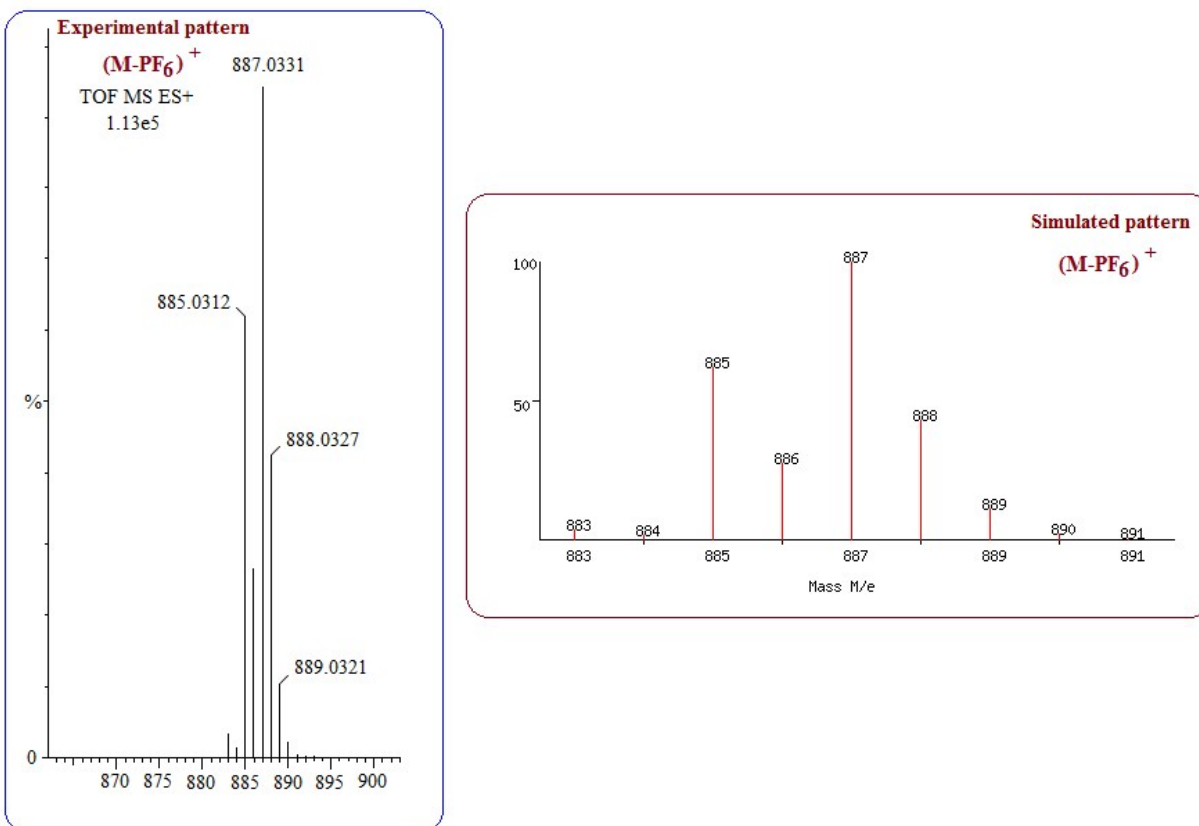

**Fig. S13.** TOF MS spectrum of complex 2.



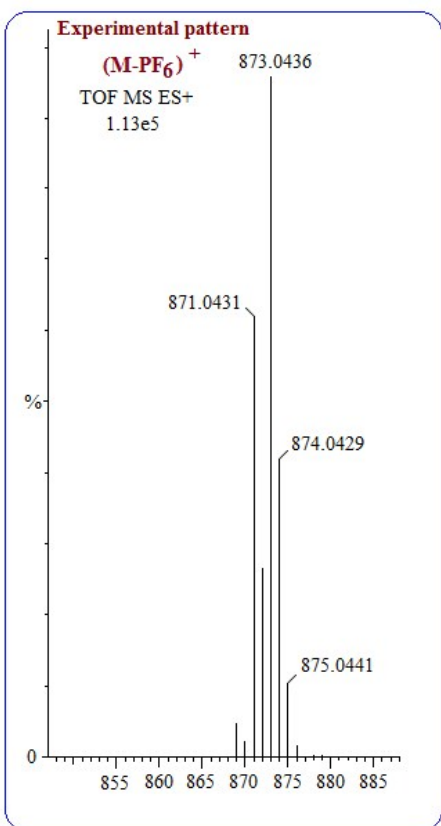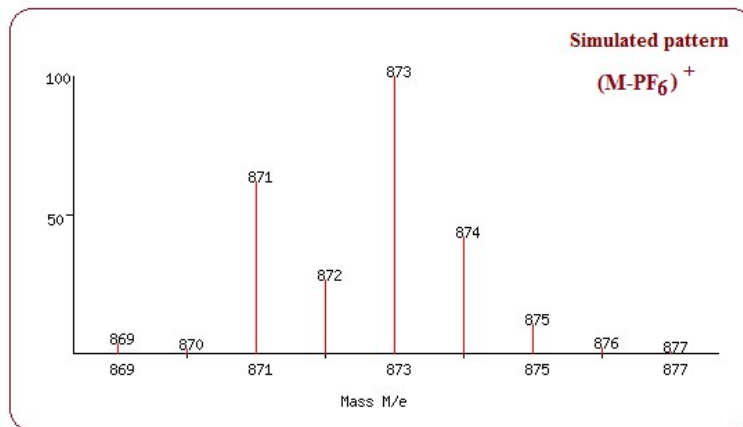

**Fig. S14.** TOF MS spectrum of complex **3**.

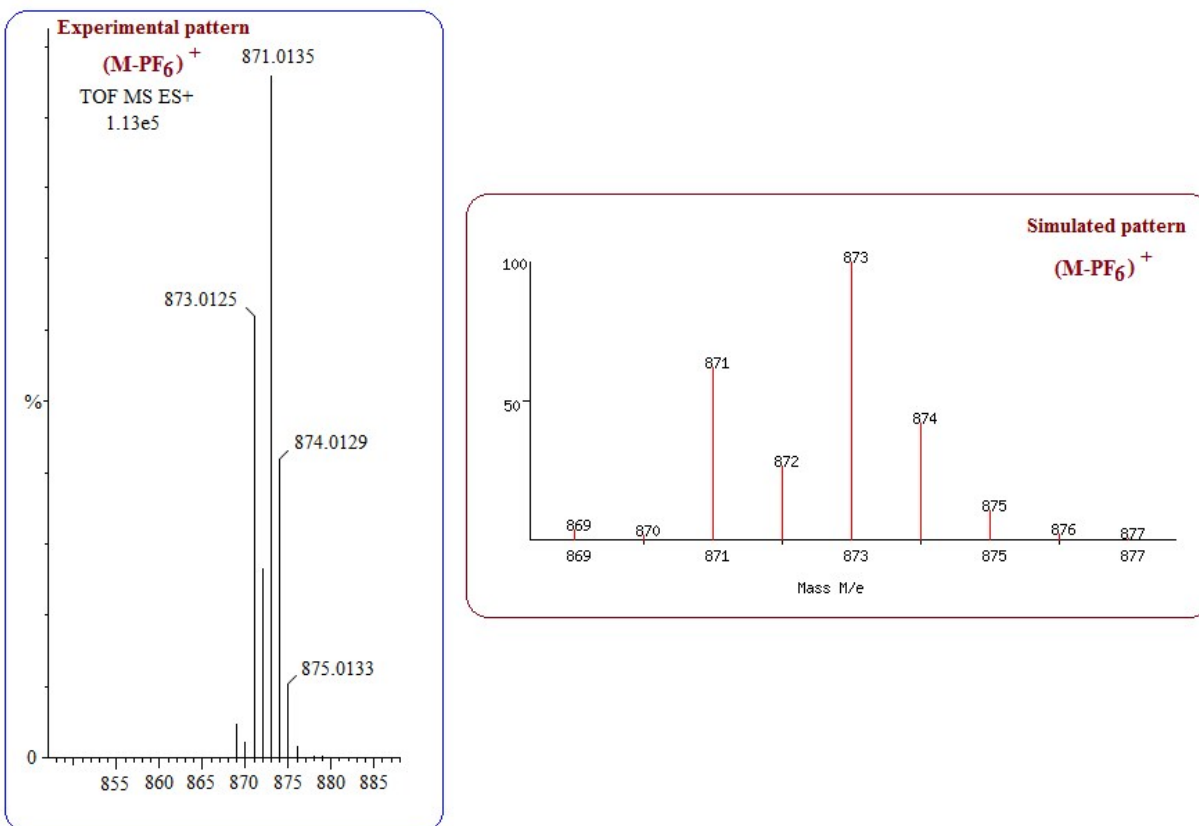

**Fig. S15.** TOF MS spectrum of complex 4.

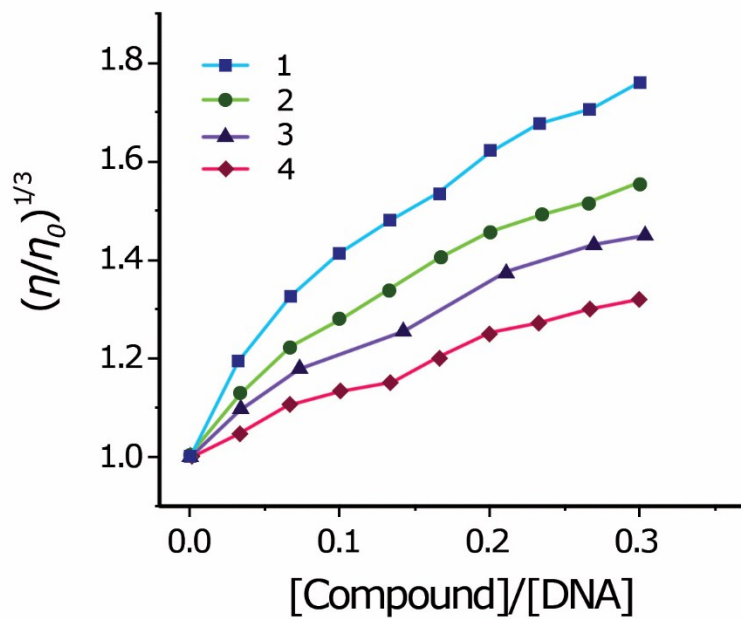

**Fig. S16.** Effect of increasing amounts of complexes **1-4** on the relative viscosity of CT DNA at  $37.0 \pm 0.1$  °C.  $[\text{DNA}] = 5 \mu\text{M}$  and  $[\text{complexes}] = 0\text{-}5 \mu\text{M}$ . (inset: plot of  $[\text{DNA}]/(\epsilon_a - \epsilon_b)$  vs.  $[\text{DNA}]$ ).

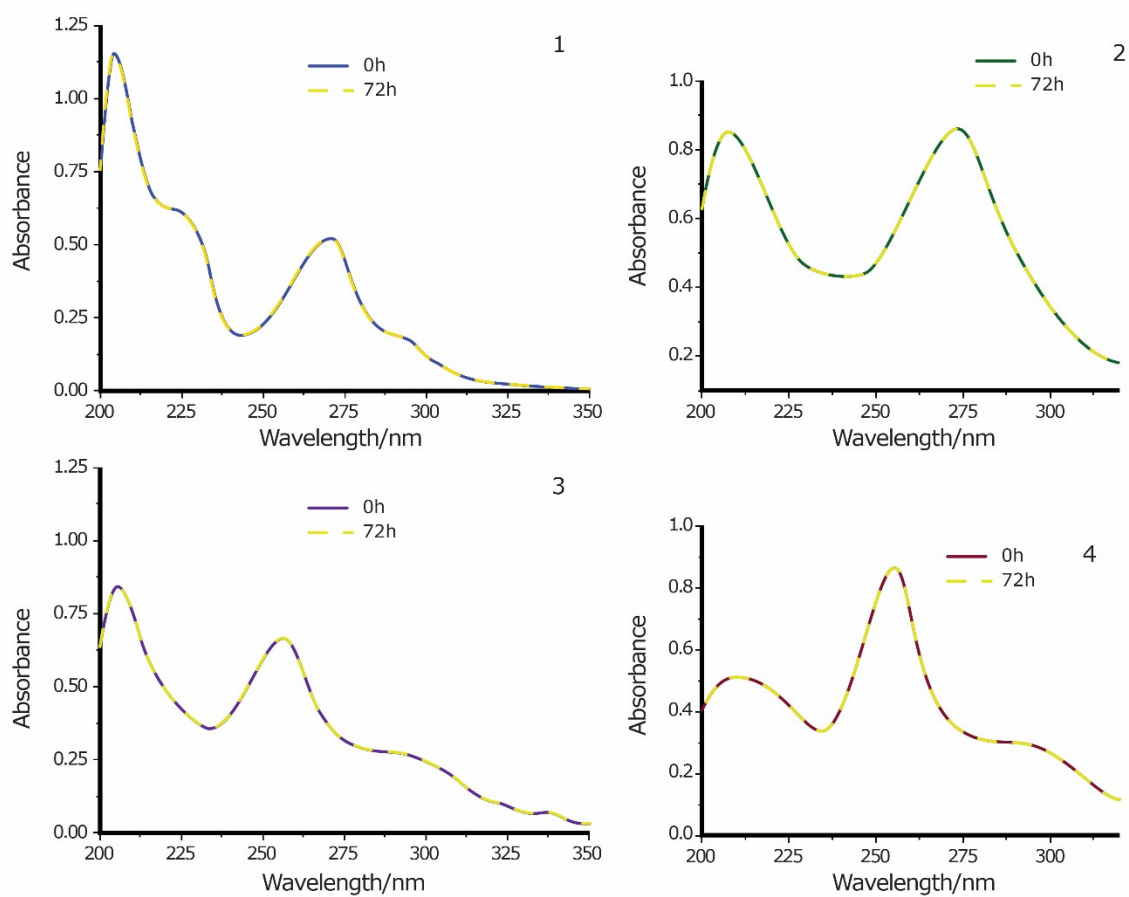

**Fig. S17.** UV–vis absorption spectra of complex 1-4 in Tris buffer at pH 7.2 and 37 °C (physiological conditions) and at different time intervals (0h and 72h).

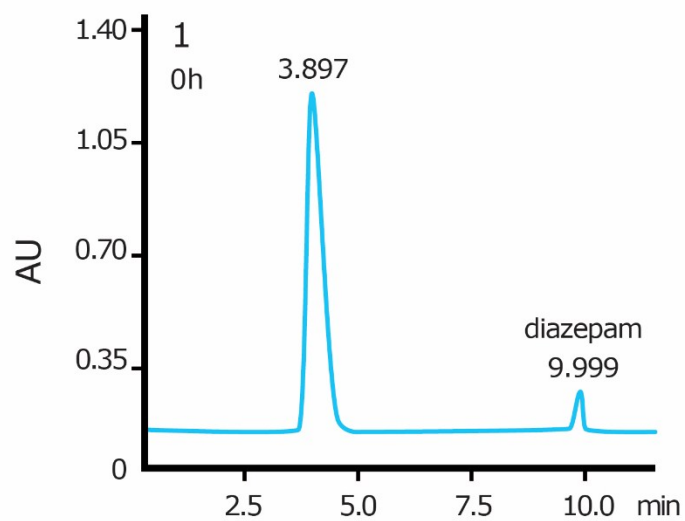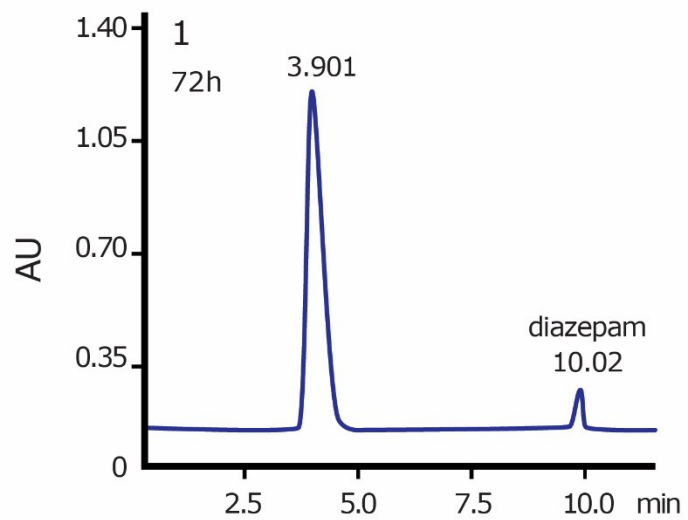

**Fig. S18.** LC-UV traces of plasma incubated with complex **1** (20  $\mu$ M, 37  $^{\circ}$ C) at  $t = 0$  and 72 h. (Diazepam was used as internal standard).

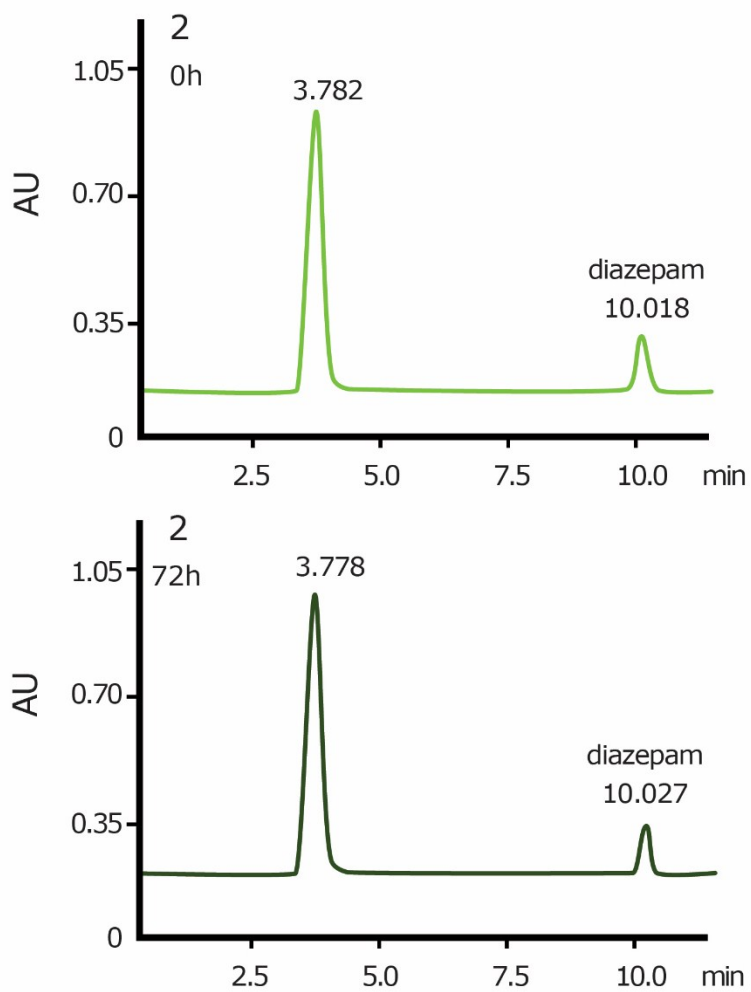

**Fig. S19.** LC-UV traces of plasma incubated with complex **2** (20  $\mu$ M, 37  $^{\circ}$ C) at  $t = 0$  and 72 h. (Diazepam was used as internal standard).

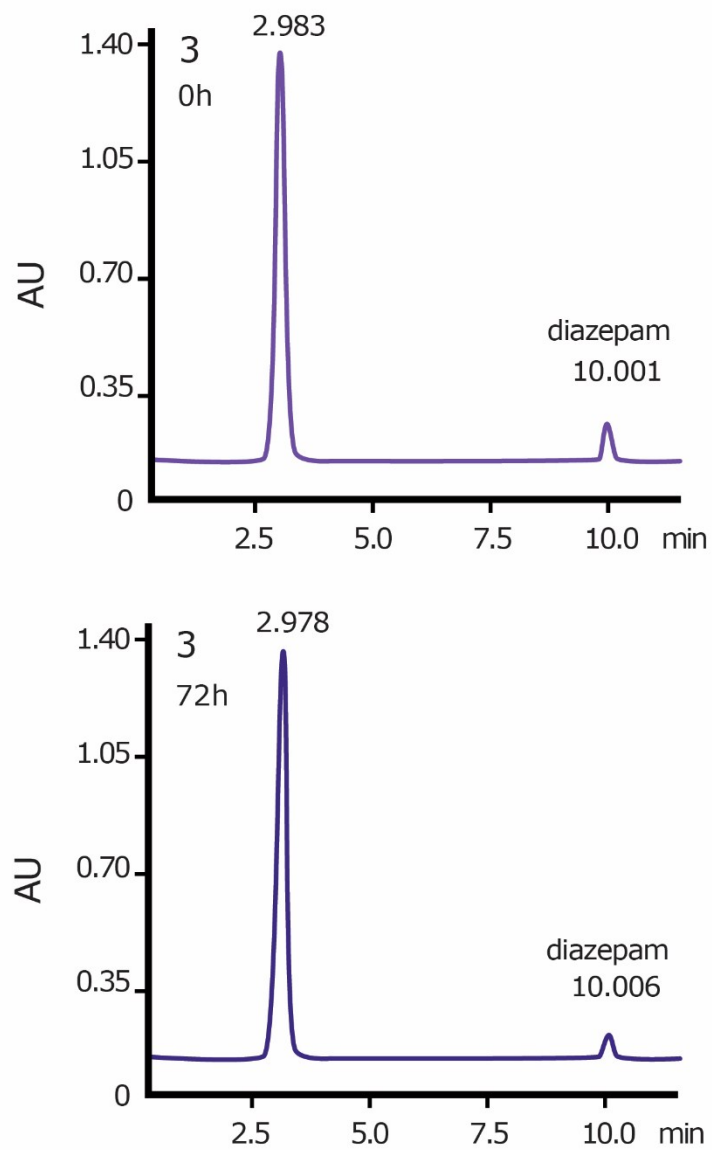

**Fig. S20.** LC-UV traces of plasma incubated with complex **3** (20  $\mu$ M, 37  $^{\circ}$ C) at  $t = 0$  and 72 h. (Diazepam was used as internal standard).

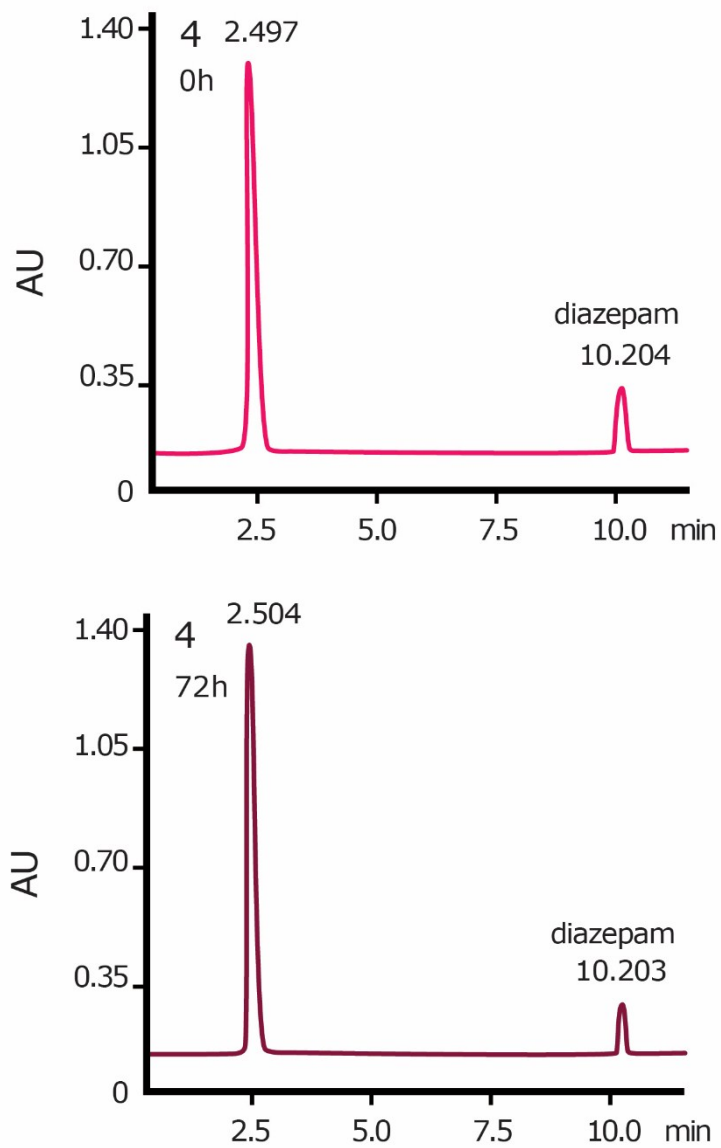

**Fig. S21.** LC-UV traces of plasma incubated with complex 4 (20  $\mu$ M, 37  $^{\circ}$ C) at t = 0 and 72 h. (Diazepam was used as internal standard).



**Table S1.** Selected  $^1\text{H}$  NMR data of the free ligands and complexes **1-4** ( $\text{DMSO-}d_6$ ,  $\delta$ : ppm).

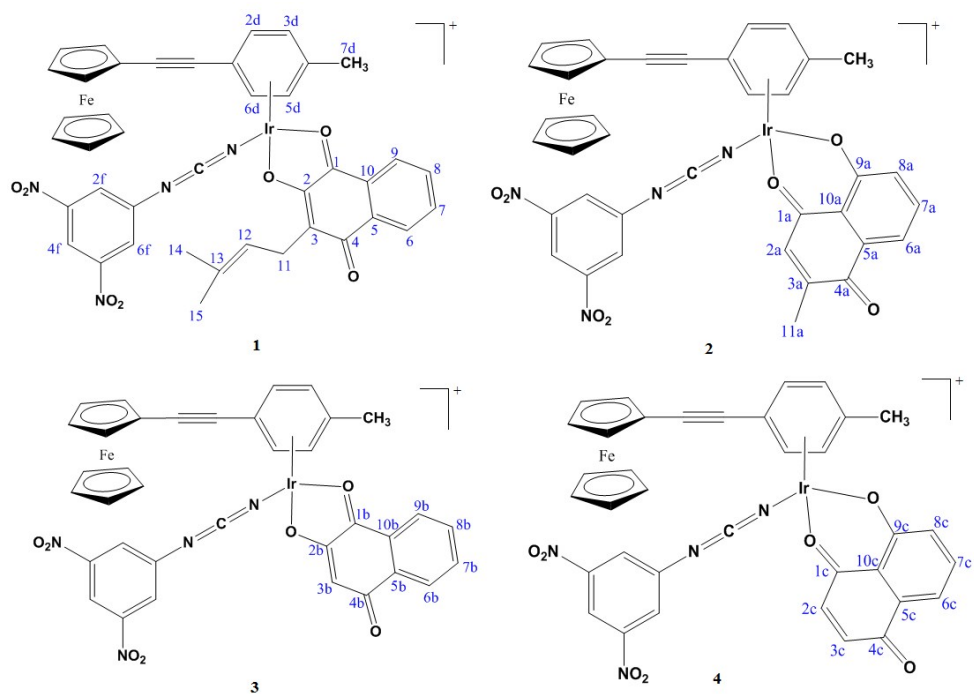

| Protons      | Ligands                 | <b>1</b>                | <b>2</b>                | <b>3</b>     | <b>4</b> |
|--------------|-------------------------|-------------------------|-------------------------|--------------|----------|
| H-OH (Lap)   | 11.09 (s, 1H)           | -                       | -                       | -            | -        |
| H-6          | 8.09 (d, 1H, $^3J$ 7.6) | 8.00 (d, 1H, $^3J$ 7.6) | -                       | -            | -        |
| H-9          | 7.97 (d, 1H, $^3J$ 7.6) | 7.89 (d, 1H, $^3J$ 7.6) | -                       | -            | -        |
| H-7          | 7.82 (t, 1H, $^3J$ 7.6) | 7.63 (t, 1H, $^3J$ 7.6) | -                       | -            | -        |
| H-8          | 7.61 (t, 1H, $^3J$ 7.6) | 7.52 (t, 1H, $^3J$ 7.6) | -                       | -            | -        |
| H-12         | 5.17 (t, 1H, $^3J$ 7.2) | 5.01 (t, 1H, $^3J$ 7.2) | -                       | -            | -        |
| H-11         | 3.08 (d, 2H, $^3J$ 7.2) | 2.86 (d, 2H, $^3J$ 8.0) | -                       | -            | -        |
| H-14 or H-15 | 1.79 (s, 3H)            | 1.69 (s, 3H)            | -                       | -            | -        |
| H-14 or H-15 | 1.63 (s, 3H)            | 1.50 (s, 3H)            | -                       | -            | -        |
| H-(OH)       | 11.38 (s, 1H)           | -                       | -                       | -            | -        |
| (Plum)       |                         |                         |                         |              |          |
| H-7a, 8a     | 7.62 (t, 2H, $^3J$ 7.6) | -                       | 7.51 (t, 2H, $^3J$ 7.6) | -            | -        |
| H-6a         | 7.30 (d, 1H, $^3J$ 7.6) | -                       | 7.10 (d, 1H, $^3J$ 7.6) | -            | -        |
| H-2a         | 6.90 (s, 1H)            | -                       | 6.74 (s, 1H)            | -            | -        |
| H-11a        | 2.21 (s, 3H)            | -                       | 2.11 (s, 3H)            | -            | -        |
| H-(OH)       | 11.51 (s, 1H)           | -                       | -                       | -            | -        |
| (Law)        |                         |                         |                         |              |          |
| H-3b         | 6.25 (s, 1H)            | -                       | -                       | 6.36 (s, 1H) | -        |

|              |                                  |                                  |                                  |                                  |                                  |
|--------------|----------------------------------|----------------------------------|----------------------------------|----------------------------------|----------------------------------|
| H-6b or 9b   | 8.00 (d, 1H, <sup>3</sup> J 7.6) | -                                | -                                | 8.22(d, 1H, <sup>3</sup> J 7.6)  | -                                |
| H-6b or 9b   | 7.91 (d, 1H, <sup>3</sup> J 7.6) | -                                | -                                | 8.10 (d, 1H, <sup>3</sup> J 7.6) | -                                |
| H-7b or 8b   | 7.81 (t, 1H, <sup>3</sup> J 7.6) | -                                | -                                | 7.63 (t, 1H, <sup>3</sup> J 7.6) | -                                |
| H-7b or 8b   | 7.89 (t, 1H, <sup>3</sup> J 7.6) | -                                | -                                | 7.81 (t, 1H, <sup>3</sup> J 7.6) | -                                |
| H-(OH) (Jug) | 11.58 (s, 1H)                    | -                                | -                                | -                                | -                                |
| H-7c         | 7.81 (t, 1H, <sup>3</sup> J 7.6) | -                                | -                                | -                                | 7.71 (t, 1H, <sup>3</sup> J 7.6) |
| H-6c or 8c   | 7.39 (d, 1H, <sup>3</sup> J 7.6) | -                                | -                                | -                                | 7.33 (d, 1H, <sup>3</sup> J 7.6) |
| H-6c or 8c   | 7.25 (d, 1H, <sup>3</sup> J 7.6) | -                                | -                                | -                                | 7.17 (d, 1H, <sup>3</sup> J 7.6) |
| H-2c or 3c   | 7.13 (d, 1H, <sup>3</sup> J 7.6) | -                                | -                                | -                                | 7.01 (d, 1H, <sup>3</sup> J 7.6) |
| H-2c or 3c   | 7.00 (d, 1H, <sup>3</sup> J 7.6) | -                                | -                                | -                                | 6.85 (d, 1H, <sup>3</sup> J 7.6) |
| H-Cp         | 4.38 (s, 5H)                     | 4.28 (s, 5H)                     | 4.25 (s, 5H)                     | 4.29 (s, 5H)                     | 4.29 (s, 5H)                     |
| H-Cp         | 4.23 (t, 2H, <sup>3</sup> J 7.6) | 4.10 (t, 2H, <sup>3</sup> J 7.6) | 4.11 (t, 2H, <sup>3</sup> J 7.6) | 4.11 (t, 2H, <sup>3</sup> J 7.6) | 4.11 (t, 2H, <sup>3</sup> J 7.6) |
| H-Cp         | 4.50 (t, 2H, <sup>3</sup> J 7.6) | 4.41 (t, 2H, <sup>3</sup> J 7.6) | 4.39 (t, 2H, <sup>3</sup> J 7.6) | 4.42 (t, 2H, <sup>3</sup> J 7.6) | 4.42 (t, 2H, <sup>3</sup> J 7.6) |
| H-Ph (L1)    | 7.18 (d, 2H, <sup>3</sup> J 8.0) | 5.60 (d, 1H, <sup>3</sup> J 7.2) | 5.69 (d, 1H, <sup>3</sup> J 7.2) | 5.73 (d, 1H, <sup>3</sup> J 7.2) | 5.61 (d, 1H, <sup>3</sup> J 7.2) |
| H-Ph (L1)    | 7.07 (d, 2H, <sup>3</sup> J 8.0) | 5.42 (d, 1H, <sup>3</sup> J 7.2) | 5.49 (d, 1H, <sup>3</sup> J 7.2) | 5.44 (d, 1H, <sup>3</sup> J 7.2) | 5.48 (d, 1H, <sup>3</sup> J 7.2) |
| H-Ph (L1)    | -                                | 5.31 (d, 1H, <sup>3</sup> J 7.2) | 5.39 (d, 1H, <sup>3</sup> J 7.2) | 5.32 (d, 1H, <sup>3</sup> J 7.2) | 5.33 (d, 1H, <sup>3</sup> J 7.2) |
| H-Ph (L1)    | -                                | 5.20 (d, 1H, <sup>3</sup> J 7.2) | 5.21 (d, 1H, <sup>3</sup> J 7.2) | 5.21 (d, 1H, <sup>3</sup> J 7.2) | 5.21 (d, 1H, <sup>3</sup> J 7.2) |
| H- 7d        | 1.91 (s, 3H)                     | 1.86 (s, 3H)                     | 1.83 (s, 3H)                     | 1.88 (s, 3H)                     | 1.86 (s, 3H)                     |
| H-2f,6f *    | 7.75 (s, 2H)                     | 7.70 (s, 2H)                     | 7.69 (s, 2H)                     | 7.90 (s, 2H)                     | 7.89 (s, 2H)                     |
| H-4f *       | 8.29 (s, 1H)                     | 8.18 (s, 1H)                     | 8.07 (s, 1H)                     | 7.99 (s, 1H)                     | 8.05 (s, 1H)                     |
| H-NH *       | 8.48 (S, 1H)                     | -                                | -                                | -                                | -                                |

\* L. Tabrizi, H. Chiniforoshan, *Dalton Trans.* 2016, **45**, 18333-18345.

**Table S2.** Ratio of peak areas of complex/diazepam

|          | <b>1</b> | <b>2</b> | <b>3</b> | <b>4</b> |
|----------|----------|----------|----------|----------|
| t = 0 h  | 9.85     | 7.82     | 8.97     | 8.11     |
| t = 72 h | 9.91     | 7.79     | 8.92     | 8.06     |
